# Supplementary material for: Tetrazine-mediated bioorthogonal removal of 3-isocyanopropyl groups enables the controlled release of nitric oxide in vivo
Source: Royal Society of Chemistry journal article supplement (doi:10.1039/d0bm01841d), 2020-12-23

## Supporting Information

### **Tetrazines-Mediated Bioorthogonal Removal of 3-Isocyanopropyl Groups Enables the Controlled Release of Nitric Oxide *In Vivo***

Jianbing Wu,<sup>a,b,#</sup> Tao Sun,<sup>a,b,#</sup> Chenxi Yang,<sup>b,#</sup> Tian Lv,<sup>b</sup> Yuyang Bi,<sup>b</sup> Yuan Xu,<sup>b</sup> Yong Ling,<sup>c</sup> Jun Zhao,<sup>d, a</sup> Rigang Cong,<sup>e</sup> Yihua Zhang,<sup>b</sup> Jianhua Wang,<sup>d, a</sup> Hao Wen,<sup>a,\*</sup> Hulin Jiang,<sup>a,b,\*</sup> Fei Li,<sup>b,\*</sup> Zhangjian Huang<sup>a,b,\*</sup>

<sup>#</sup>These authors contributed equally to this work.

<sup>a</sup> State Key Laboratory of Pathogenesis, Prevention and Treatment of High Incidence Diseases in Central Asia, Xinjiang Medical University, Urumqi, 830054, P.R. China

<sup>b</sup> State Key Laboratory of Natural Medicines, Jiangsu Key Laboratory of Drug Discovery for Metabolic Diseases, China Pharmaceutical University, Nanjing 210009, P.R. China

<sup>c</sup> School of Pharmacy, Nantong University, Nantong, 226001, P.R. China.

<sup>d</sup> Department of Pharmacy, The First Affiliated Hospital of Xinjiang Medical University, Urumqi, 830054, P.R. China

<sup>e</sup> National-certified Enterprise Technology Center. Disha Pharmaceutical Group Co., Ltd. Weihai 264205, P.R. China

## 1. Supplementary figures and table

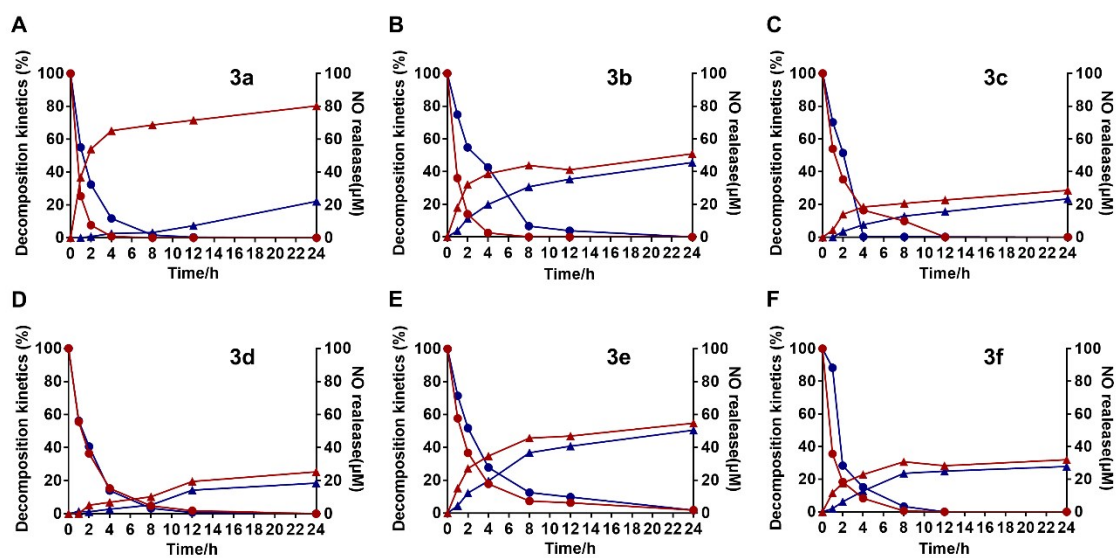

**Fig. S1** Decomposition kinetics (●) and NO release (▲) from **3a** (A), **3b** (B), **3c** (C), **3d** (D), **3e** (E) or **3f** (F) triggered by BTZ (red) or STZ (blue).

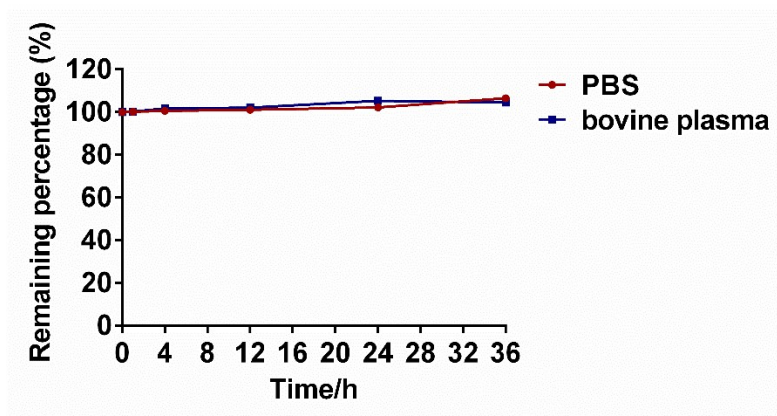

**Fig. S2** Stability of **3a** in PBS (pH = 7.4) (red) and bovine plasma (blue).

**Table S1.** IC<sub>50</sub> values of compounds m-TZ, BTZ, acrolein, **2a** and acrolein plus **2a** against HCT-116 cells <sup>a</sup>

| Compounds           | IC <sub>50</sub> (μM) |
|---------------------|-----------------------|
| BTZ                 | >50                   |
| m-TZ                | >50                   |
| Acrolein            | 11.94 ± 1.03          |
| <b>2a</b>           | 78.51 ± 4.11          |
| Acrolein+ <b>2a</b> | 8.03 ± 0.64           |

<sup>a</sup>Data were expressed as the mean from five individual experiments.

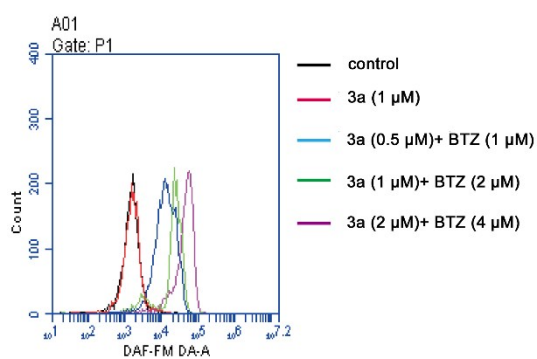

**Fig. S3** NO released from **3a** in HCT-116 cells without or with the pretreatment of BTZ by using a NO probe (DAF-FM DA).

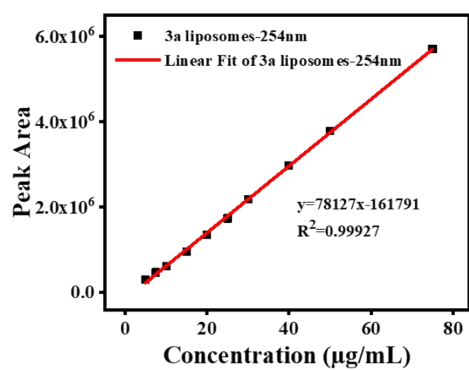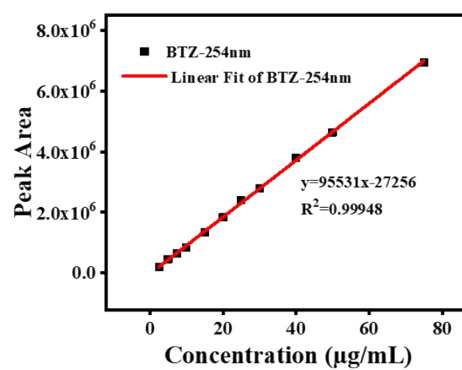

Drug loading of **3a** liposomes: 2.55%

Drug loading of BTZ liposomes: 1.38%

**Fig. S4** The drug loading of **3a** liposomes and BTZ liposomes were measured by high performance liquid chromatography, respectively.

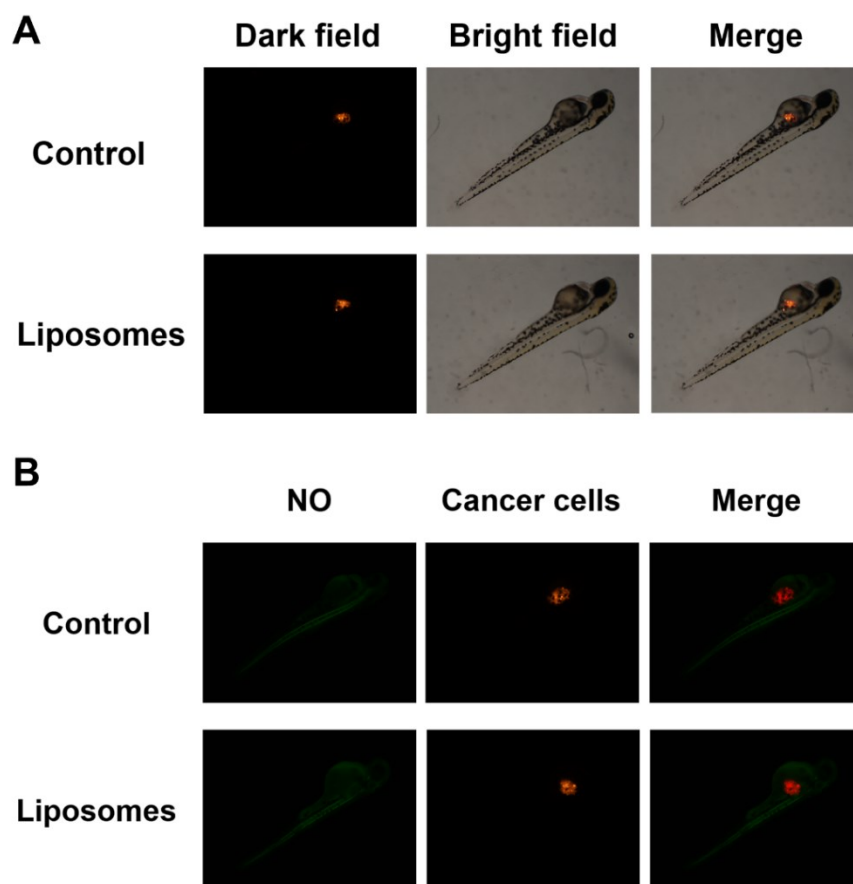

**Fig. S5** In the assay to evaluate the anticancer activity of liposome in zebrafish implanted with CM-Dil-labeled HCT-116 cells (illustrated in Figure 6A), the representative confocal microscopy images of zebrafish for each group at 0 h before administration of the test compounds. B) In the dual-imaging assay (illustrated in Figure 6D), the representative confocal microscopy images of xenografts model zebrafish for each group at 0 h before administration of the test compounds.

## 2. NMR and HRMS Spectra for target compounds

### 3a <sup>1</sup>H NMR CDCl<sub>3</sub> 303K AV-300

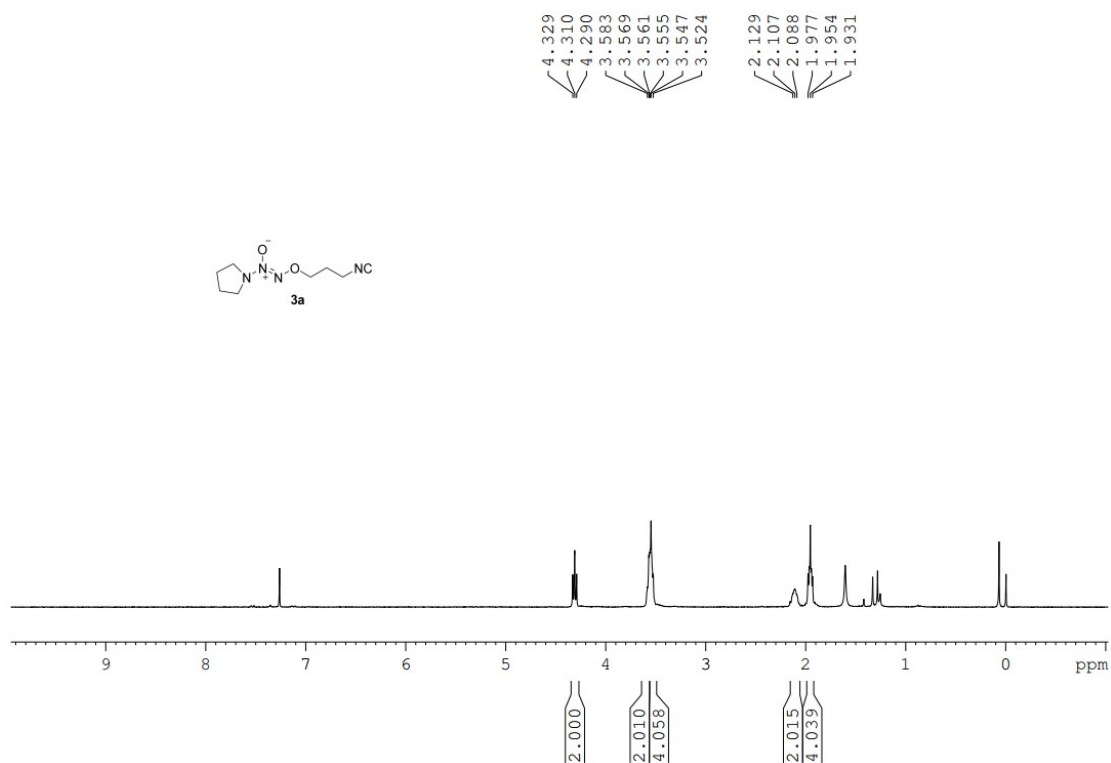

### 3a <sup>13</sup>C NMR CDCl<sub>3</sub> 303K AV-300

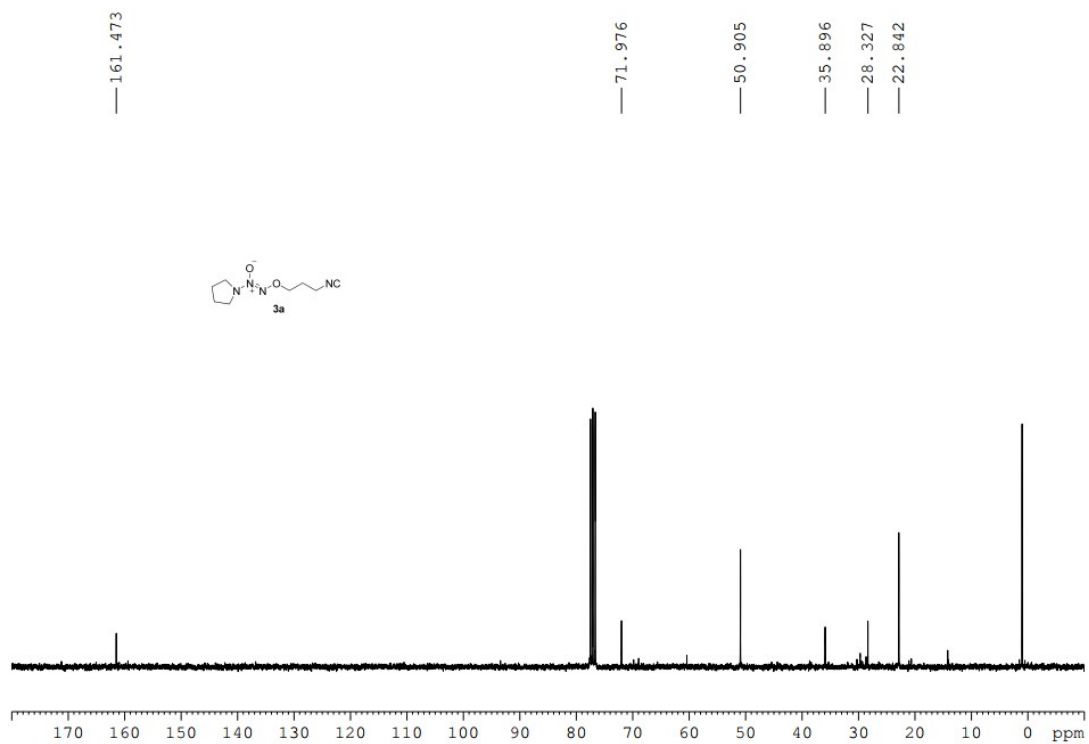

### 3a HRMS (ESI)

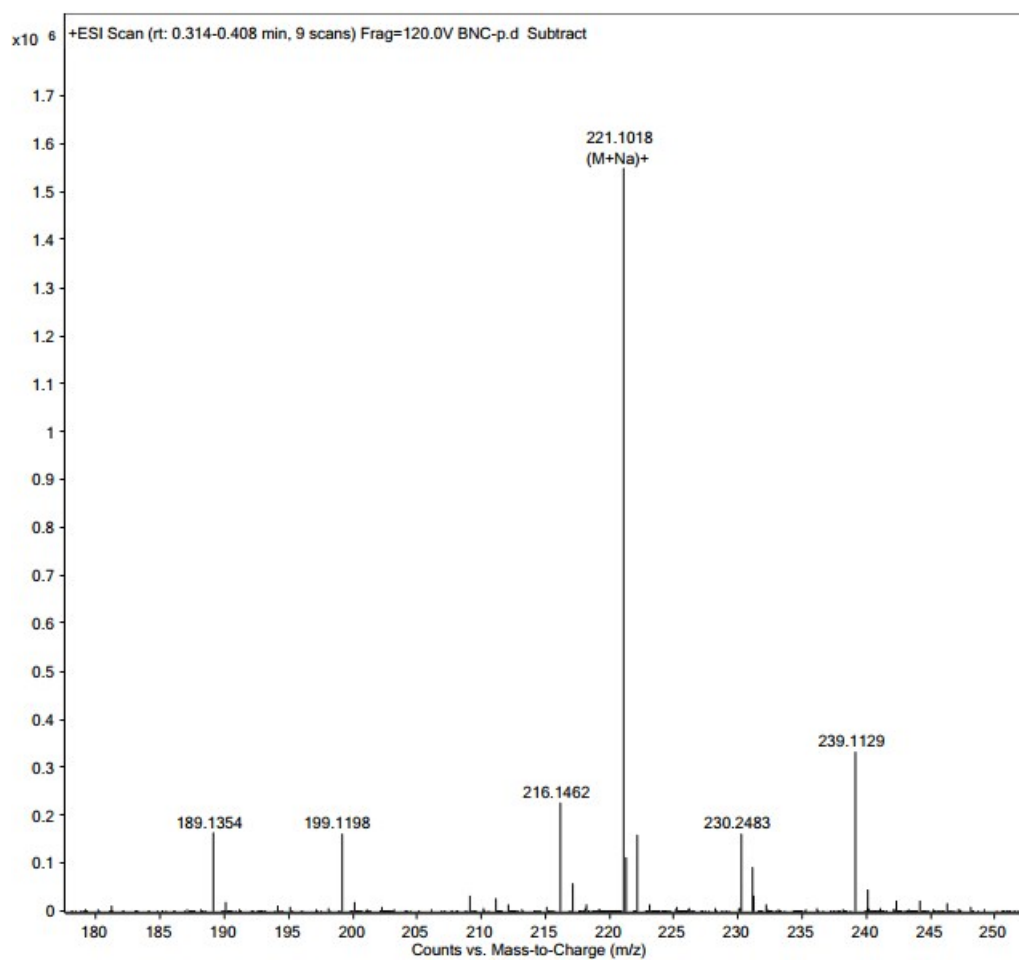

**3b** <sup>1</sup>H NMR DMSO-*d*<sub>6</sub> 303K AV-300

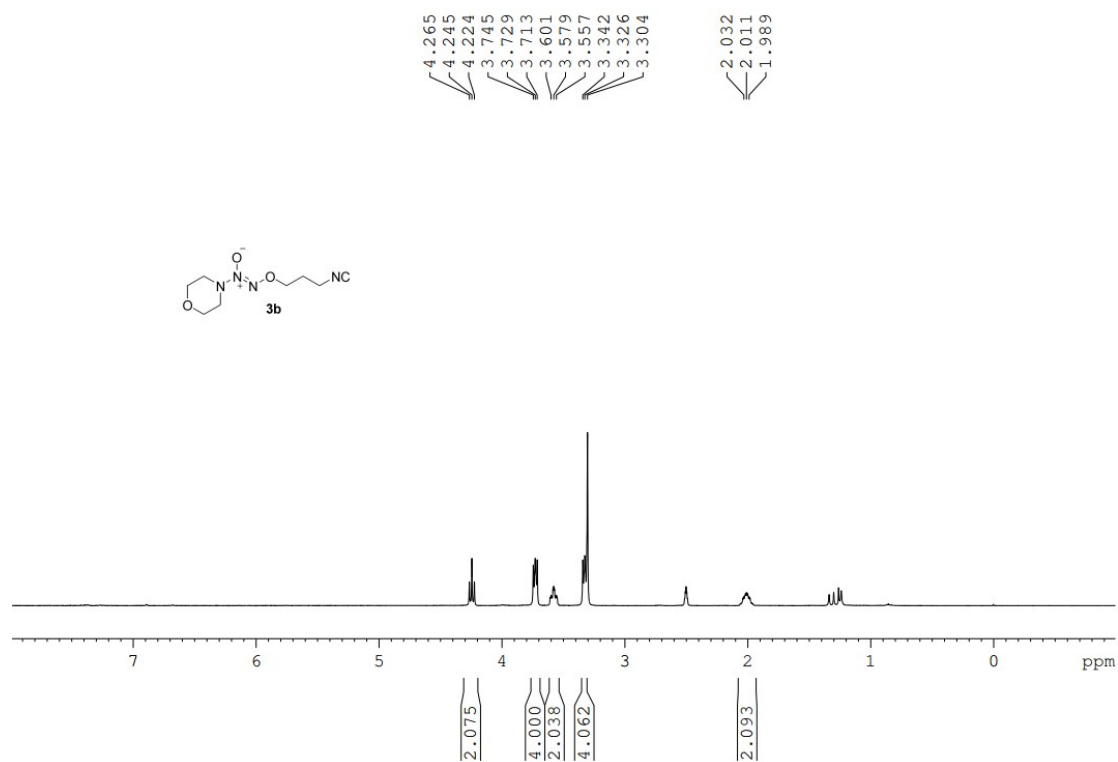

**3b** <sup>13</sup>C NMR CDCl<sub>3</sub> 303K AV-300

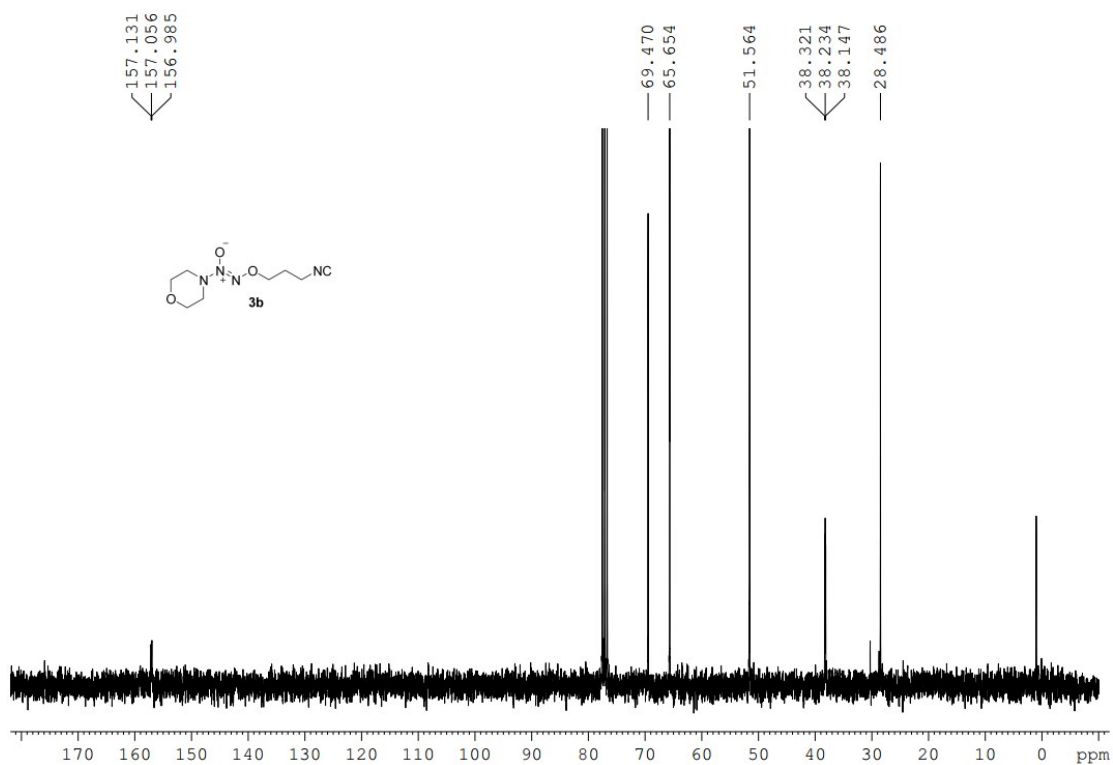



### 3b HRMS (ESI)

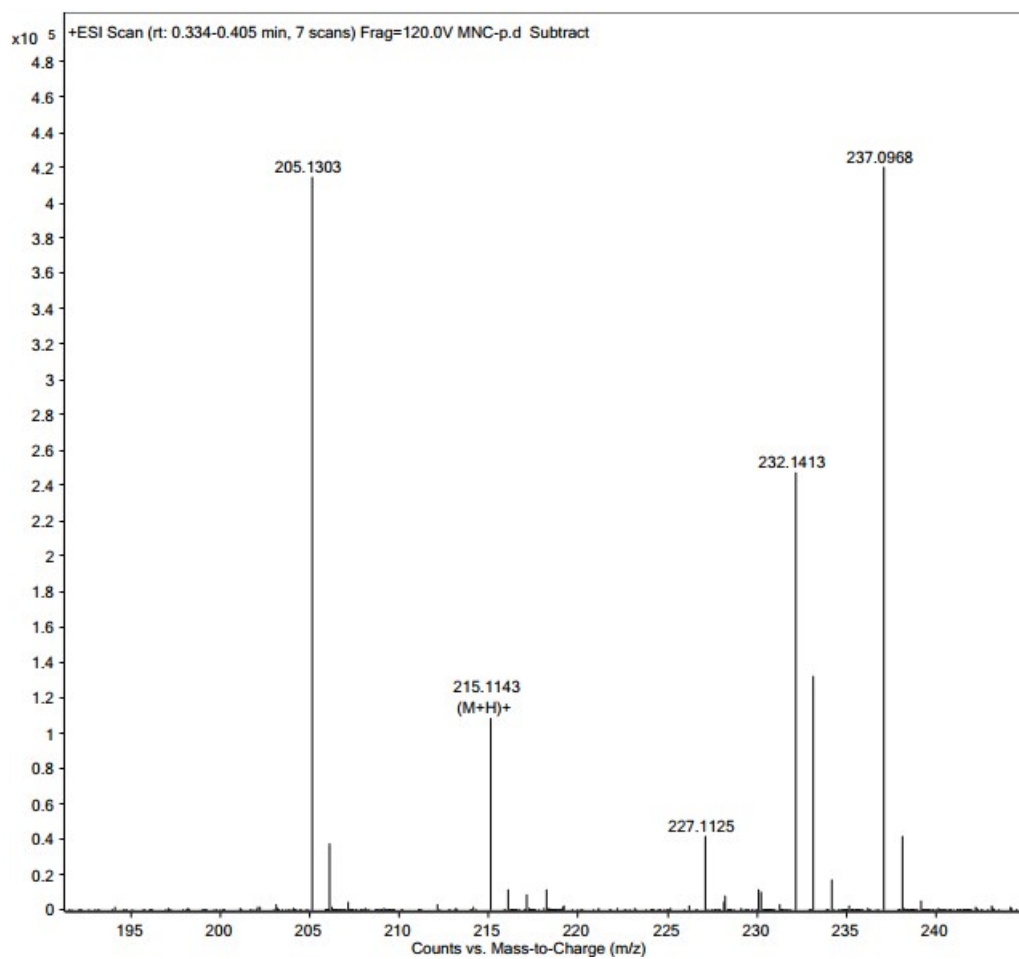

**3c**  $^1\text{H}$  NMR  $\text{CDCl}_3$  303K AV-300

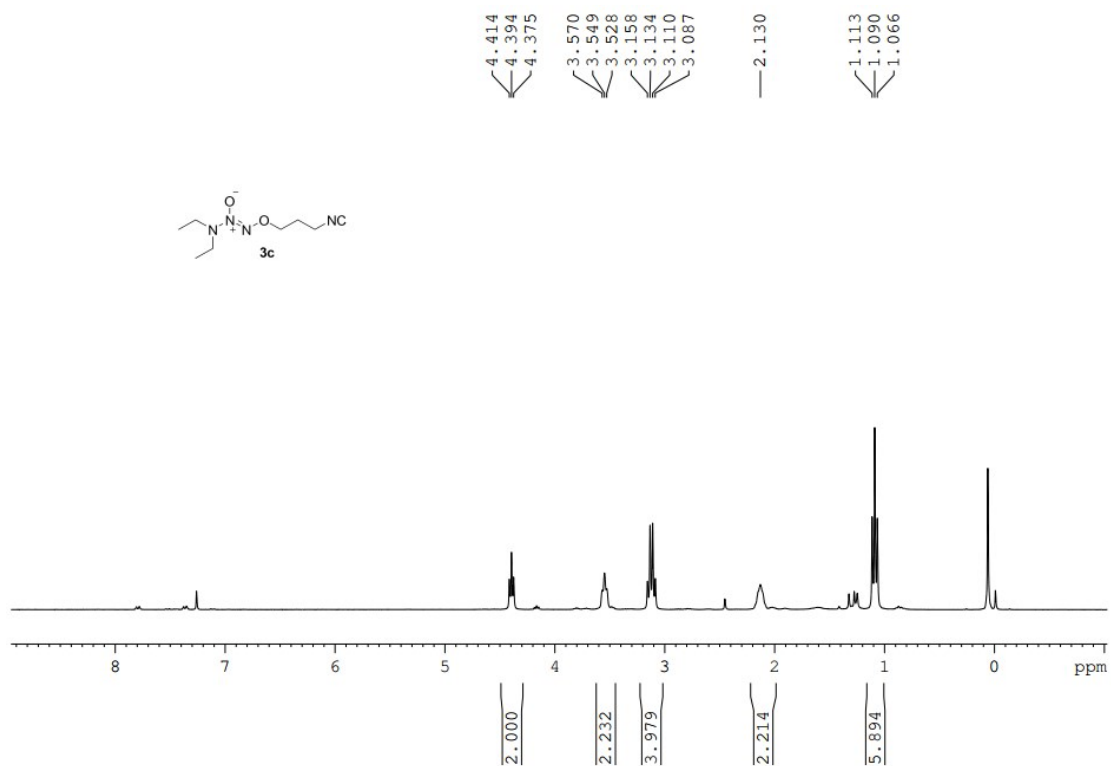

**3c**  $^{13}\text{C}$  NMR  $\text{CDCl}_3$  303K AV-300

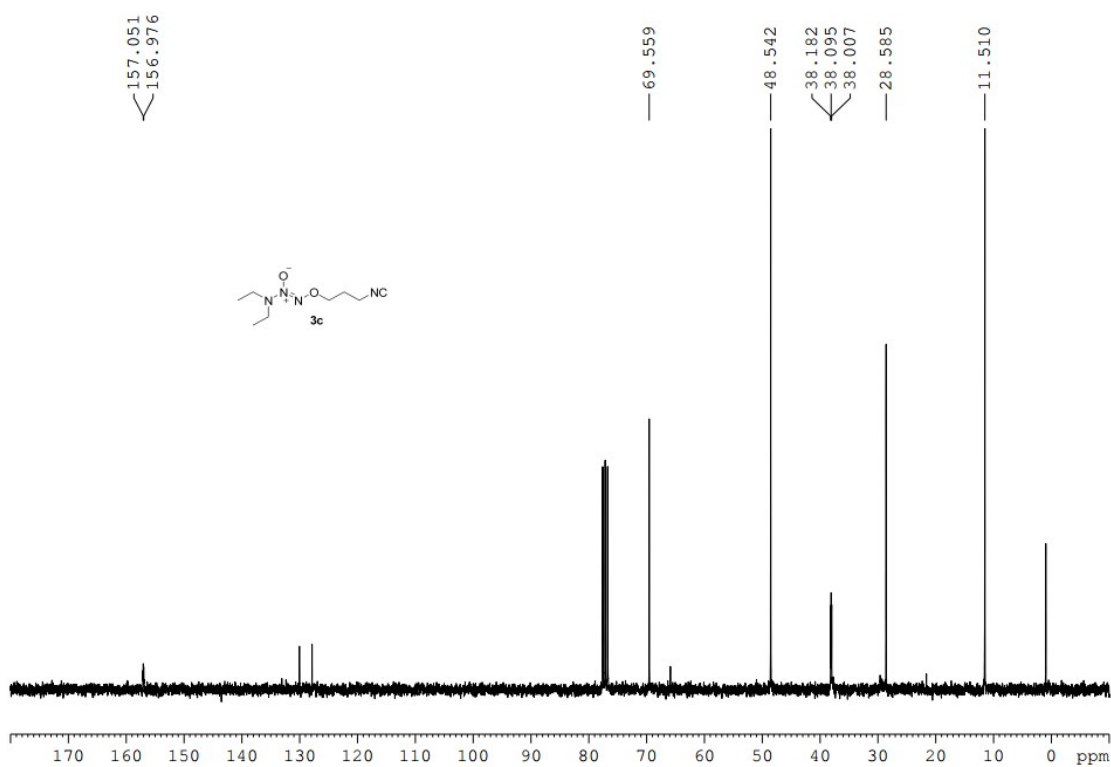

### 3c HRMS (ESI)

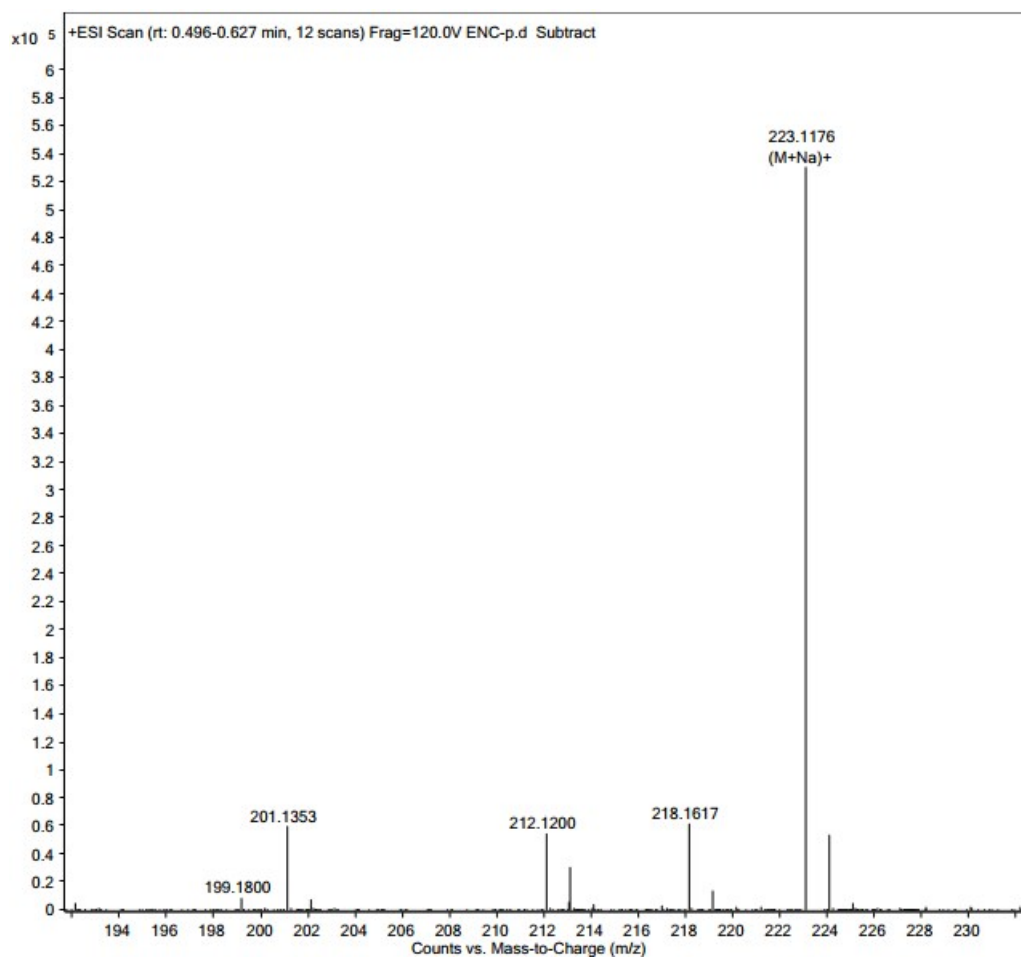

**3d** <sup>1</sup>H NMR CDCl<sub>3</sub> 303K AV-300

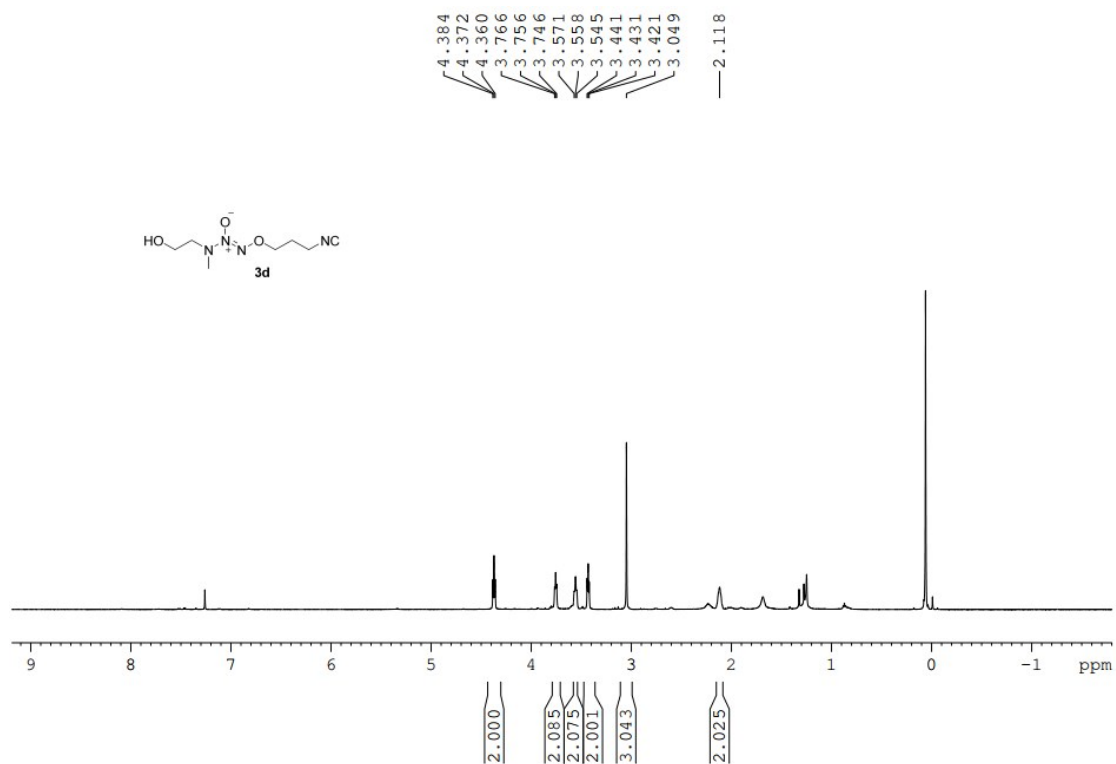

**3d** <sup>13</sup>C NMR CDCl<sub>3</sub> 303K AV-300

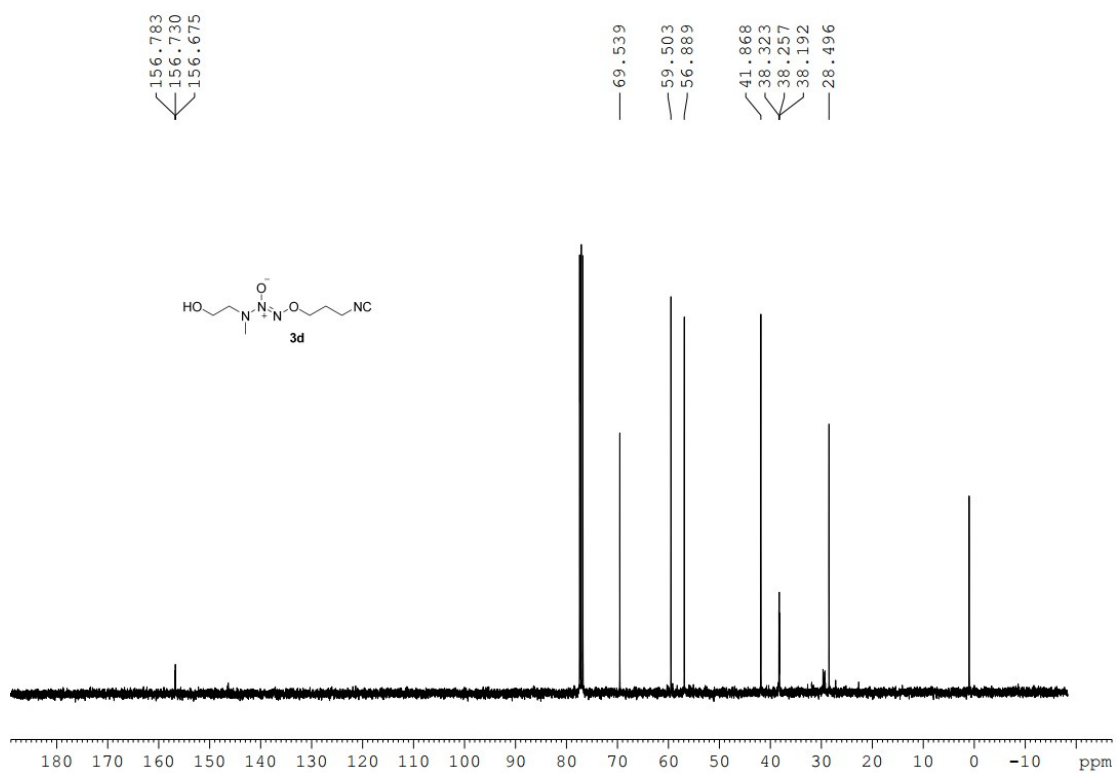

### 3d HRMS (ESI)

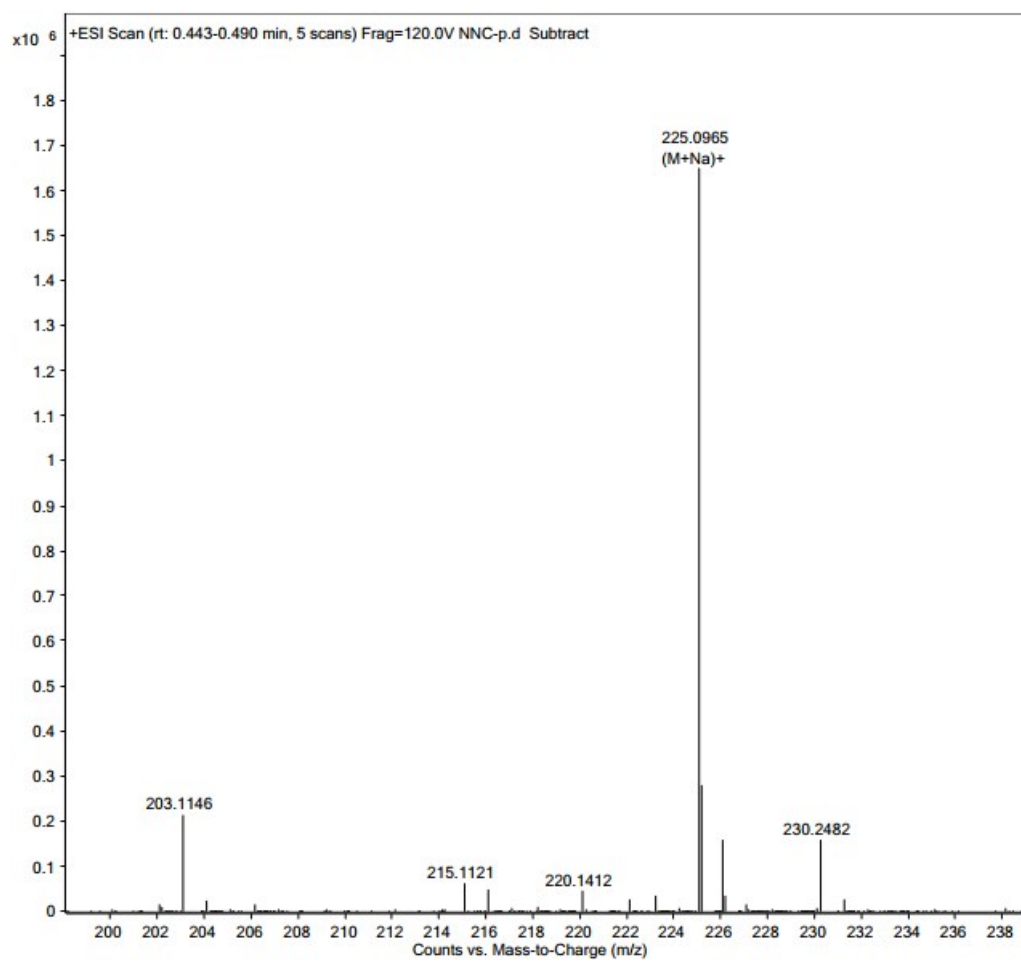

**3e**  $^1\text{H}$  NMR  $\text{CDCl}_3$  303K AV-300

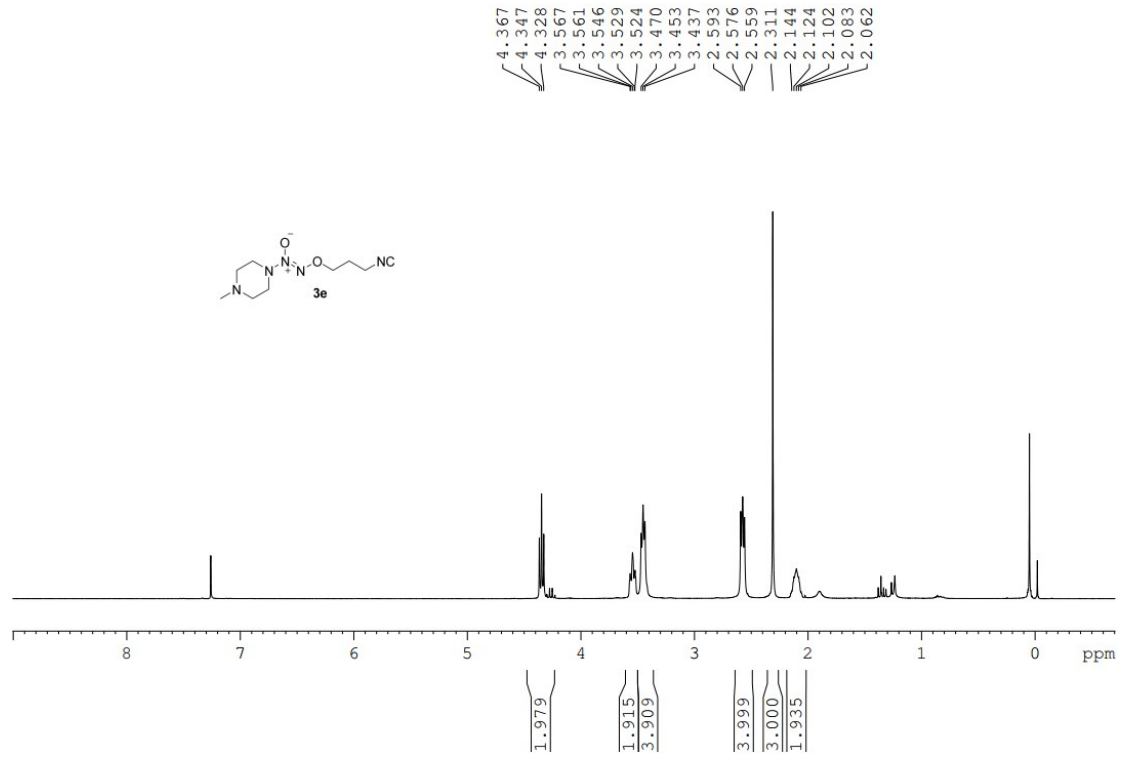

**3e**  $^{13}\text{C}$  NMR  $\text{CDCl}_3$  303K AV-300

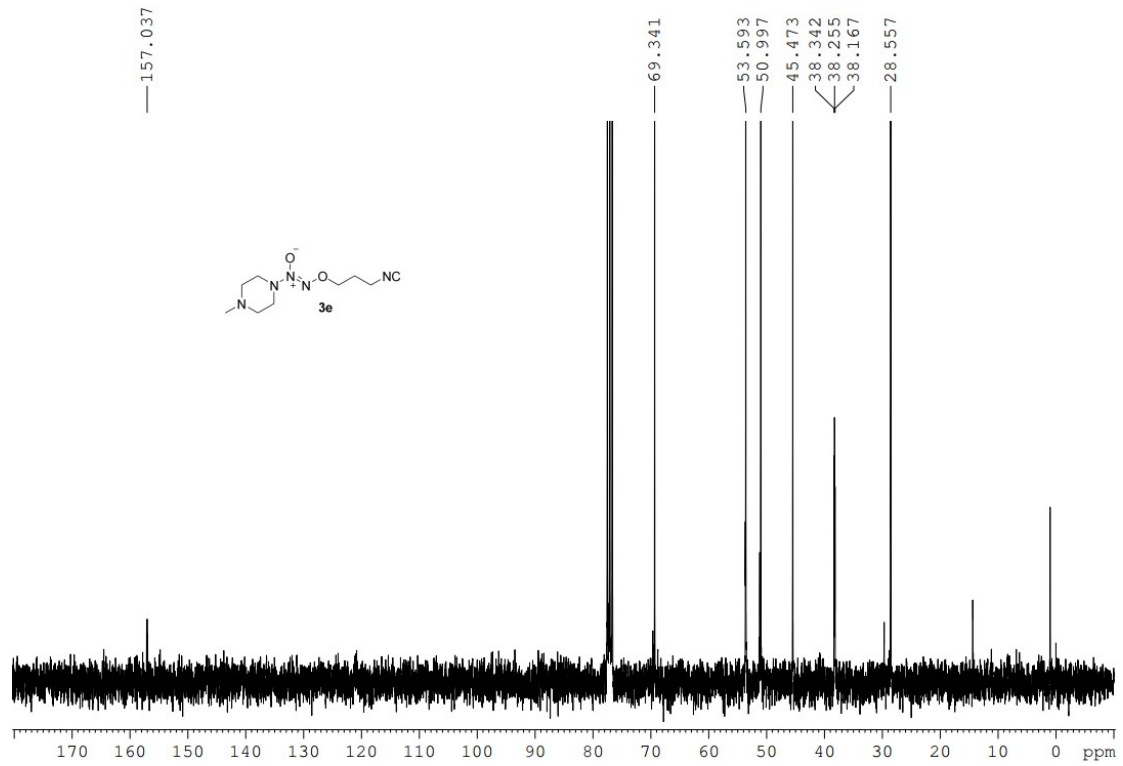

### 3e HRMS (ESI)

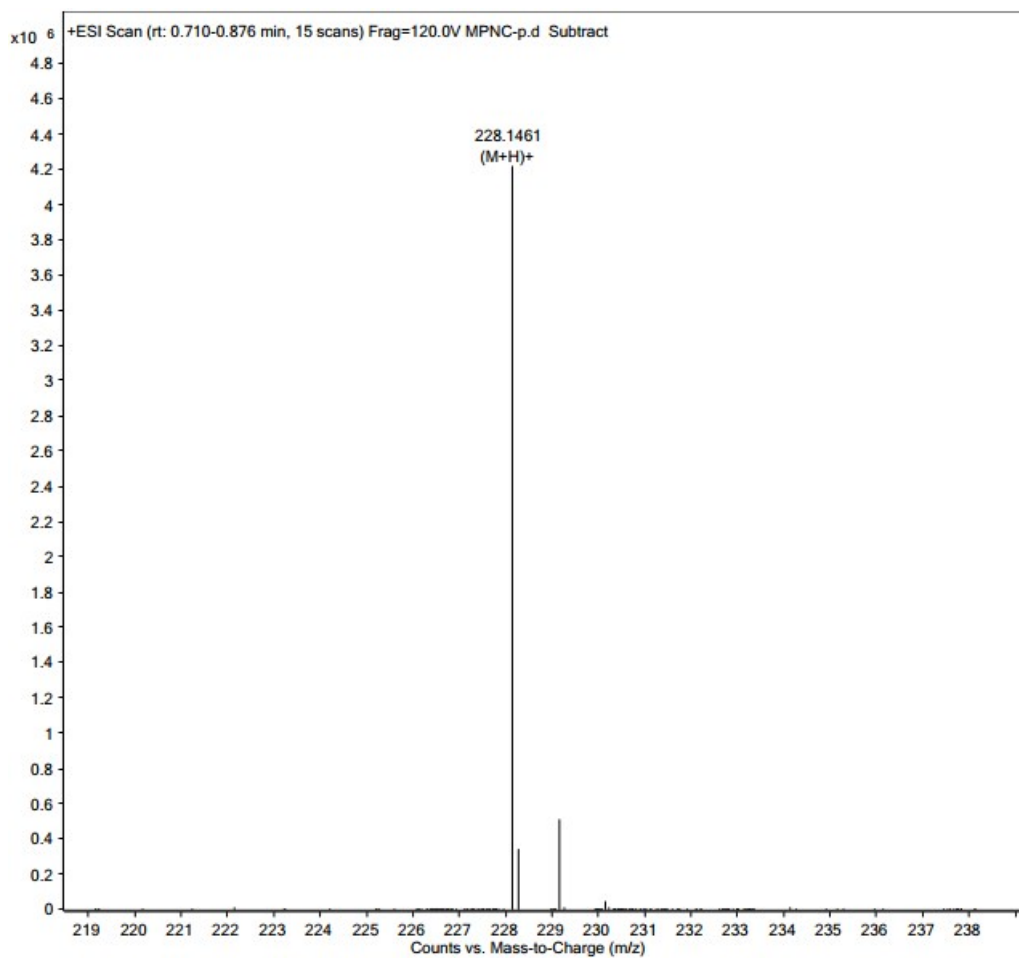

**3f** <sup>1</sup>H NMR CDCl<sub>3</sub> 303K AV-300

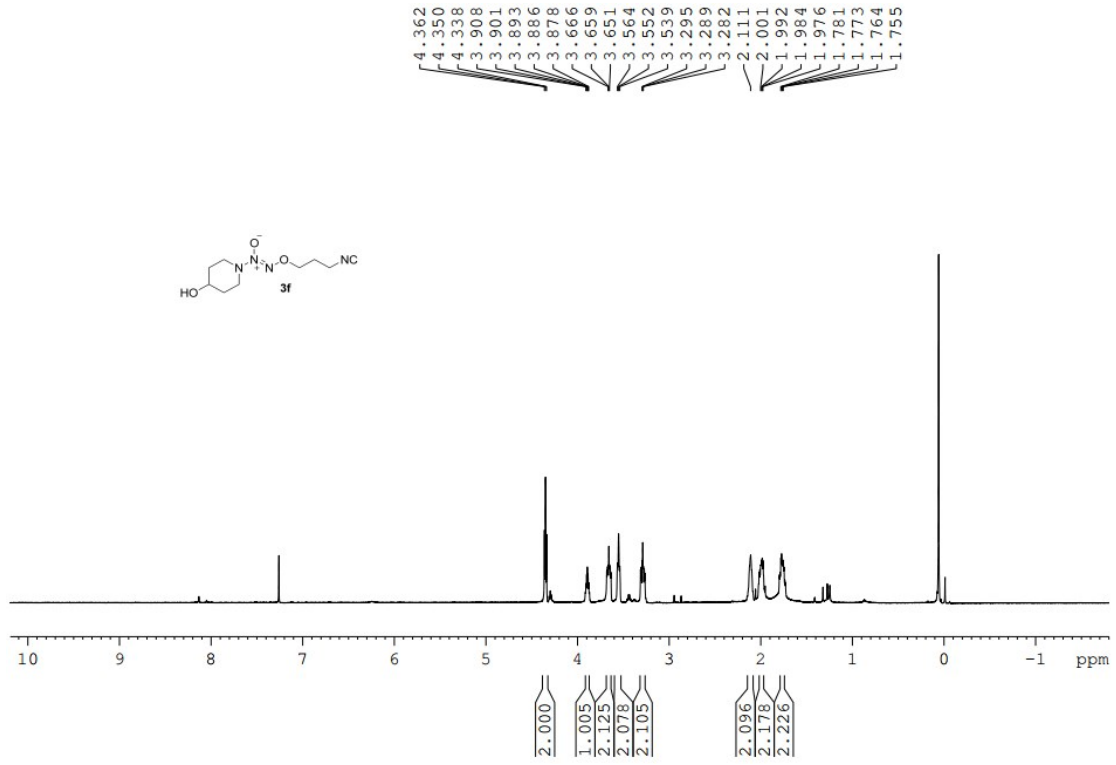

**3f** <sup>13</sup>C NMR CDCl<sub>3</sub> 303K AV-300

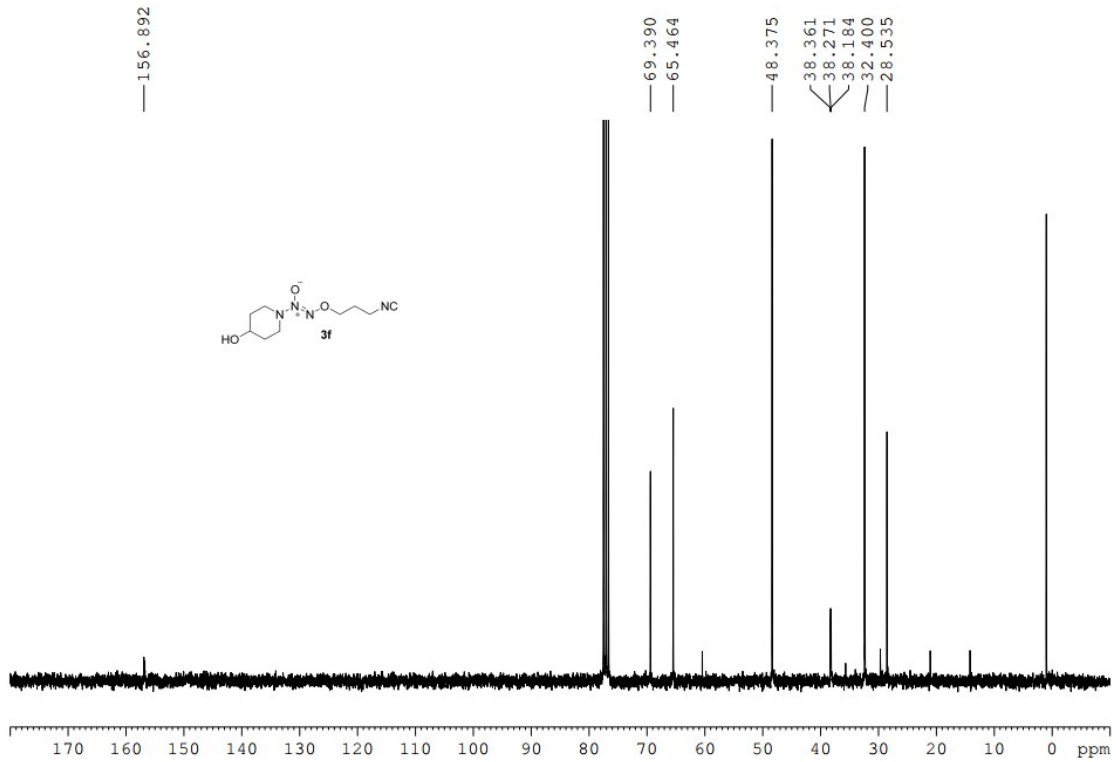



### 3f HRMS (ESI)

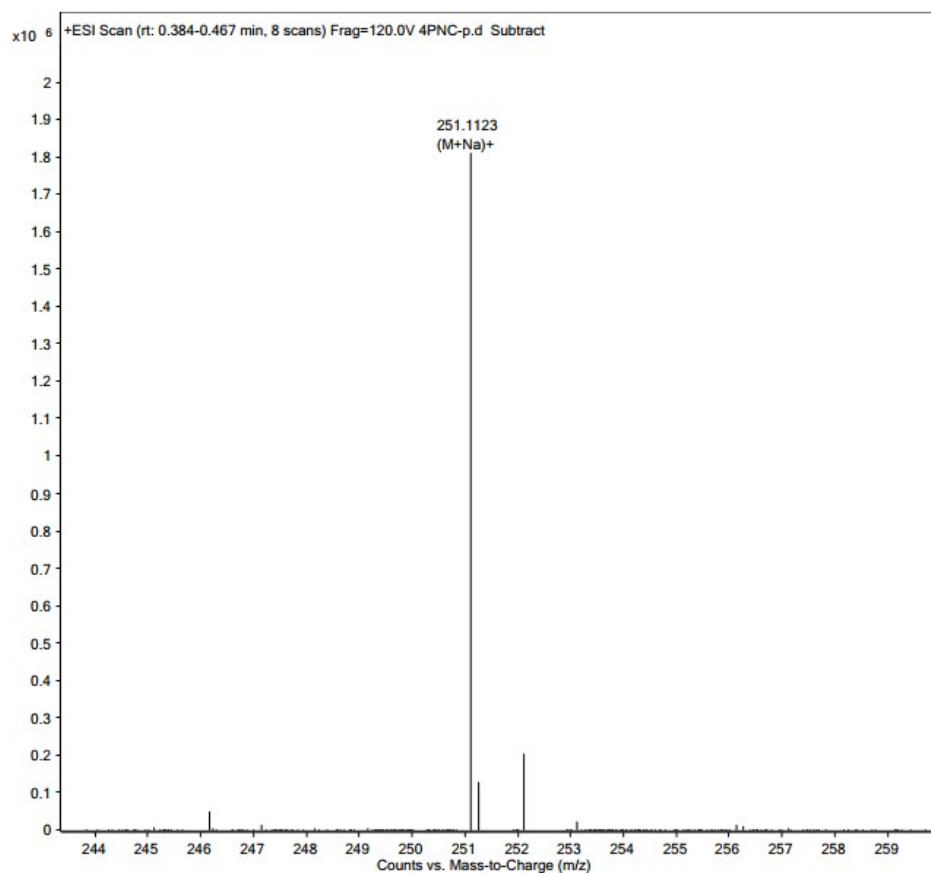

### 3. HPLC assessment of compounds purity

Compounds **3a-f** with purities of >97% were used for further biological assays. We provided the spectra of HPLC assays as below.

Column: Innovai ODS2 (4.6 × 150 mm, 5 μm, 100 Å);

Mobile phase: Methanol-Water (70: 30 to 40: 60, v/v);

Detection Wavelength: 254 nm;

Rate: 0.5 ~ 1.0 mL/min;

Temperature: 25 °C;

#### **3a**, purity 99.53%

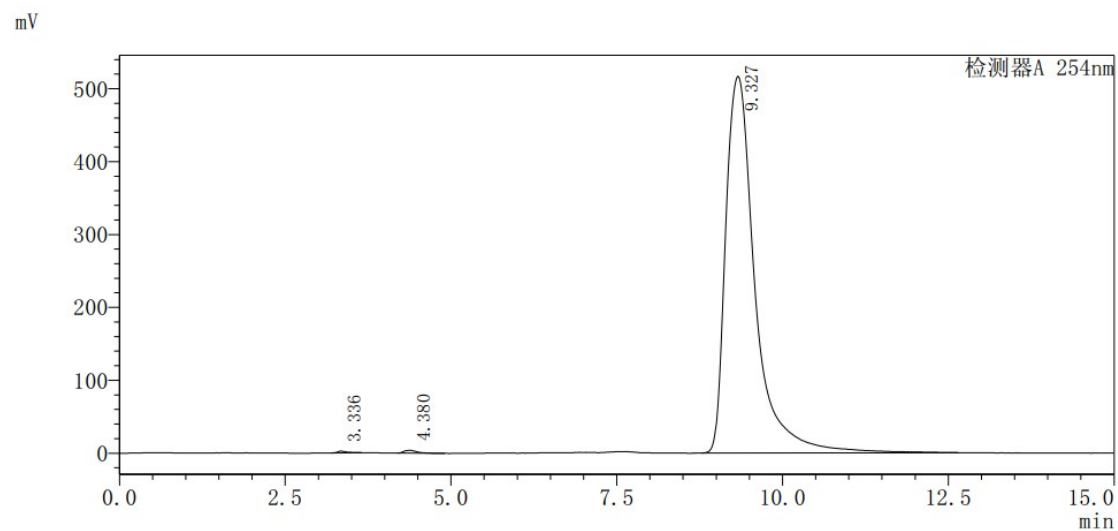

#### **3b**, purity 99.08%

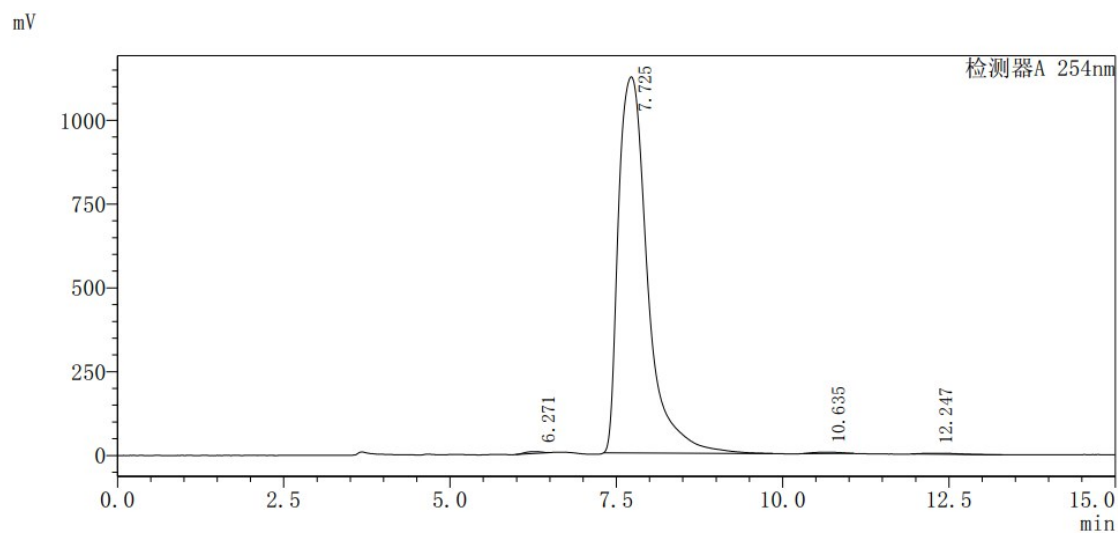

**3c**, purity 99.57%

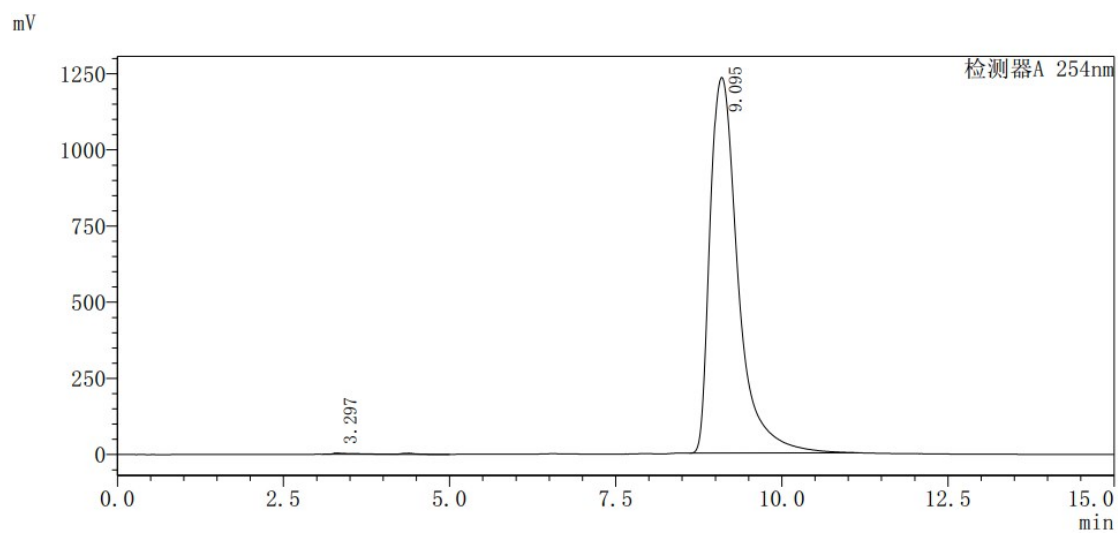

**3d**, purity 97.54%

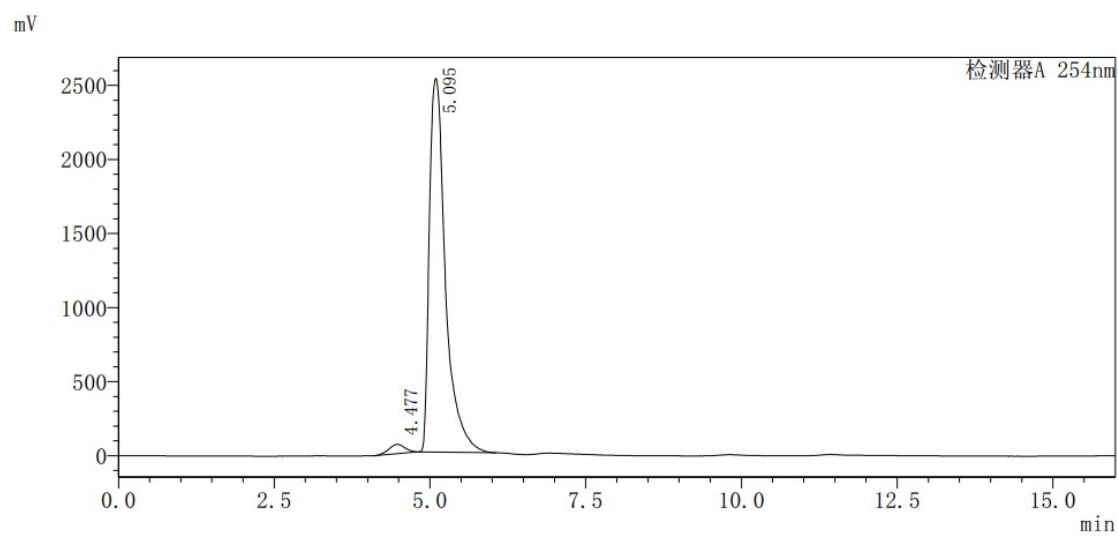

**3e**, purity 98.88%

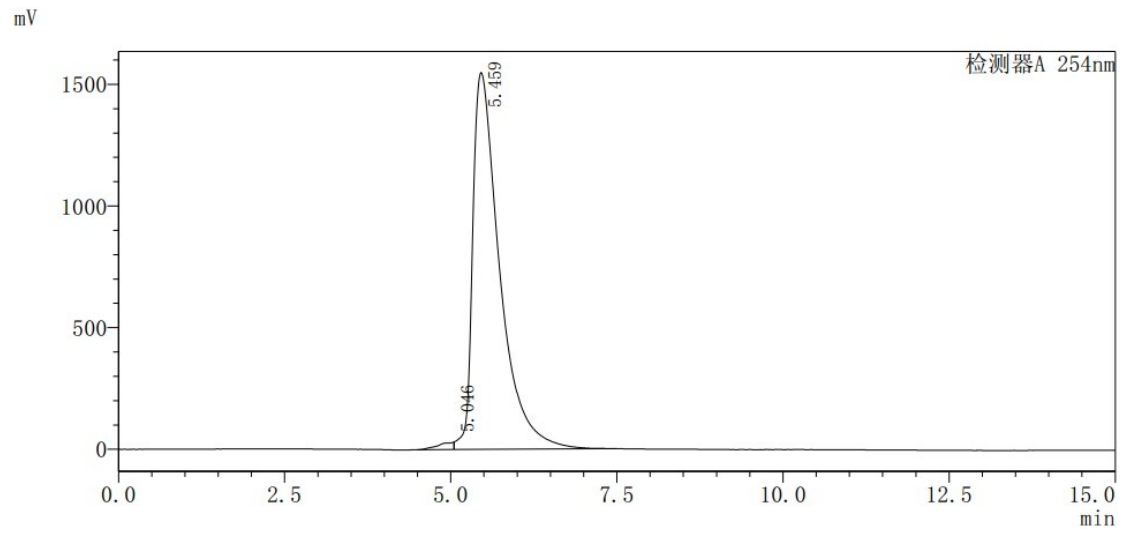

**3f**, purity 98.53%

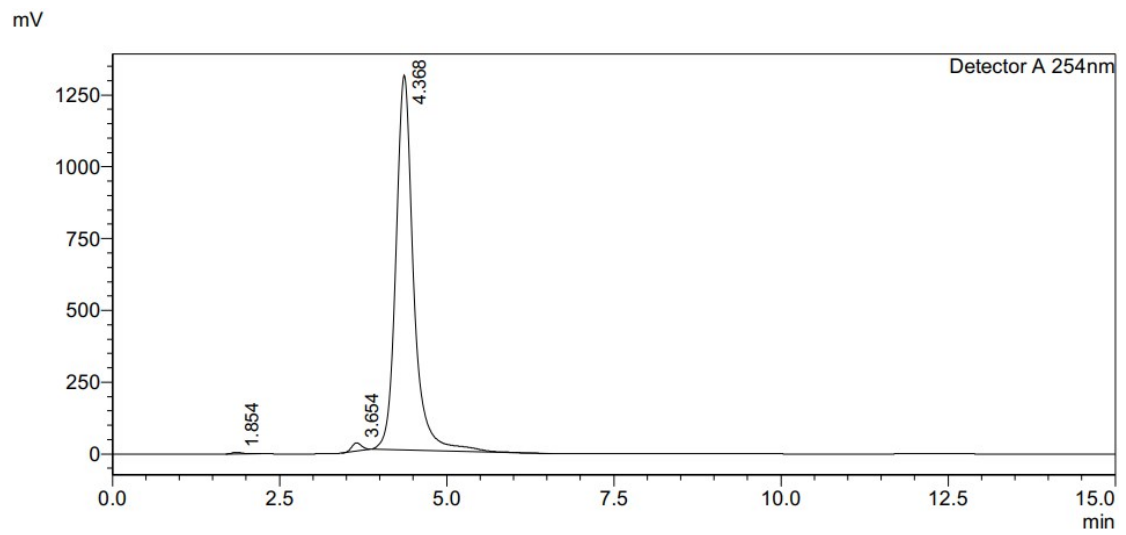

Supplement: d0bm01841d1.pdf [file d0bm01841d1.pdf]
